# Supplementary material for: Urinary proteomics of Henoch-Schönlein purpura nephritis in children using liquid chromatography-tandem mass spectrometry
Source: Clin Proteomics. 2020 Mar 12;17:10. doi: 10.1186/s12014-020-09274-x (PMC7066733; doi:10.1186/s12014-020-09274-x)
Supplement: Supplementary file 4 — Additional file 4. Raw data of the information of 125 proteins. [file 12014_2020_9274_MOESM4_ESM.xls]

Protein ID	HSPN/Normal	T test p value	Protein name	Gene ID	Gene name	GO annotations	Pathways
J3QSE8	24.461431	0.011144379	Fanconi anemia group J protein	-	BRIP1	GO:0006139(BP:nucleobase-containing compound metabolic process);GO:0005634(CC:nucleus);GO:0005524(MF:ATP binding);GO:0004003(MF:ATP-dependent DNA helicase activity);GO:0003677(MF:DNA binding)	-
P15169	23.085862	0.047316634	Carboxypeptidase N catalytic chain	1369	CPN1	GO:0010815(BP:bradykinin catabolic process);GO:0006518(BP:peptide metabolic process);GO:0016485(BP:protein processing);GO:0030449(BP:regulation of complement activation);GO:0051384(BP:response to glucocorticoid);GO:0005576(CC:extracellular region);GO:0005615(CC:extracellular space);GO:0004181(MF:metallocarboxypeptidase activity);GO:0008270(MF:zinc ion binding)	-
A5PL27	14.733488	0.026576546	CP protein	1356	CP	GO:0006879(BP:cellular iron ion homeostasis);GO:0006825(BP:copper ion transport);GO:0005765(CC:lysosomal membrane);GO:0005507(MF:copper ion binding);GO:0004322(MF:ferroxidase activity)	hsa04216(Ferroptosis);hsa00860(Porphyrin and chlorophyll metabolism)
Q56G89	13.165024	0.013357896	Serum albumin	-	-	GO:0005615(CC:extracellular space)	-
B3KWB5	8.815203	0.007927683	cDNA FLJ42722 fis, clone BRAMY4000277, highly similar to Alpha-1B-glycoprotein	-	-	-	-
M0R009	8.029605	0.045847483	Alpha-1B-glycoprotein	-	A1BG	-	-
B2R4R0	6.41985	0.007725982	Histone H4	121504	HIST1H4L	GO:0006352(BP:DNA-templated transcription, initiation);GO:0006334(BP:nucleosome assembly);GO:0000786(CC:nucleosome);GO:0005634(CC:nucleus);GO:0003677(MF:DNA binding);GO:0046982(MF:protein heterodimerization activity)	hsa05322(Systemic lupus erythematosus);hsa05203(Viral carcinogenesis);hsa05034(Alcoholism)
Q9UL88	6.368759	0.046504403	Myosin-reactive immunoglobulin heavy chain variable region	-	-	-	-
P43652	4.753394	0.049229221	Afamin	173	AFM	GO:0050821(BP:protein stabilization);GO:0071693(BP:protein transport within extracellular region);GO:0051180(BP:vitamin transport);GO:0072562(CC:blood microparticle);GO:0070062(CC:extracellular exosome);GO:0005576(CC:extracellular region);GO:0005615(CC:extracellular space);GO:0008431(MF:vitamin E binding)	-
A2J1M2	3.674261	0.017002823	Rheumatoid factor RF-IP9	-	-	-	-
A3KPE2	3.653013	0.047709287	Apolipoprotein C-III	345	APOC3	GO:0006869(BP:lipid transport);GO:0042157(BP:lipoprotein metabolic process);GO:0005576(CC:extracellular region);GO:0008289(MF:lipid binding)	hsa04979(Cholesterol metabolism);hsa03320(PPAR signaling pathway)
A0A024R5L2	3.168381	0.048540556	Aspartoacylase (Aminocyclase) 3, isoform CRA_a	91703	ACY3	GO:0016324(CC:apical plasma membrane);GO:0005737(CC:cytoplasm);GO:0004046(MF:aminoacylase activity);GO:0016788(MF:hydrolase activity, acting on ester bonds);GO:0042802(MF:identical protein binding);GO:0046872(MF:metal ion binding)	-
P0DOX5	2.904522	0.039259589	Immunoglobulin gamma-1 heavy chain	-	-	GO:0002250(BP:adaptive immune response);GO:0005576(CC:extracellular region);GO:0005886(CC:plasma membrane);GO:0003823(MF:antigen binding)	-
A0A0K0K1L8	2.794858	0.006034323	Epididymis secretory sperm binding protein Li 129m	5720	HEL-S-129m	GO:0008537(CC:proteasome activator complex)	hsa03050(Proteasome);hsa04612(Antigen processing and presentation)
P06702	2.761619	0.007770559	Protein S100-A9	6280	S100A9	GO:0006919(BP:activation of cysteine-type endopeptidase activity involved in apoptotic process);GO:0061844(BP:antimicrobial humoral immune response mediated by antimicrobial peptide);GO:0019730(BP:antimicrobial humoral response);GO:0006915(BP:apoptotic process);GO:0006914(BP:autophagy);GO:0007267(BP:cell-cell signaling);GO:0032602(BP:chemokine production);GO:0001816(BP:cytokine production);GO:004…	hsa04657(IL-17 signaling pathway)
O75487	2.654438	0.020848886	Glypican-4	2239	GPC4	GO:0006024(BP:glycosaminoglycan biosynthetic process);GO:0006027(BP:glycosaminoglycan catabolic process);GO:0098696(BP:regulation of neurotransmitter receptor localization to postsynaptic specialization membrane);GO:1905606(BP:regulation of presynapse assembly);GO:0009966(BP:regulation of signal transduction);GO:0001523(BP:retinoid metabolic process);GO:0099560(BP:synaptic membrane adhesion);GO:0…	hsa04310(Wnt signaling pathway)
A0A024R228	2.61276	0.021007137	Heterogeneous nuclear ribonucleoprotein K, isoform CRA_d	-	HNRPK	GO:0006357(BP:regulation of transcription by RNA polymerase II);GO:0006396(BP:RNA processing);GO:0003677(MF:DNA binding);GO:0003723(MF:RNA binding)	-
A0A1W2PPS5	2.611347	0.038508066	Kinesin-like protein	-	KIF12	GO:0007018(BP:microtubule-based movement);GO:0005874(CC:microtubule);GO:0005524(MF:ATP binding);GO:0008017(MF:microtubule binding);GO:0003777(MF:microtubule motor activity)	-
P43251	2.534444	0.027730724	Biotinidase	686	BTD	GO:0006768(BP:biotin metabolic process);GO:0007417(BP:central nervous system development);GO:0070062(CC:extracellular exosome);GO:0005576(CC:extracellular region);GO:0005615(CC:extracellular space);GO:0005759(CC:mitochondrial matrix);GO:0047708(MF:biotinidase activity)	hsa04977(Vitamin digestion and absorption);hsa00780(Biotin metabolism)
B4E3A8	2.420499	0.002996777	cDNA FLJ53963, highly similar to Leukocyte elastase inhibitor	-	-	GO:0005615(CC:extracellular space);GO:0004867(MF:serine-type endopeptidase inhibitor activity)	-
A0A140VJE6	2.345104	0.026221679	Guanylate cyclase	4881	-	GO:0007166(BP:cell surface receptor signaling pathway);GO:0019934(BP:cGMP-mediated signaling);GO:0042417(BP:dopamine metabolic process);GO:0048662(BP:negative regulation of smooth muscle cell proliferation);GO:0010753(BP:positive regulation of cGMP-mediated signaling);GO:0016021(CC:integral component of membrane);GO:0005622(CC:intracellular);GO:0005886(CC:plasma membrane);GO:0005524(MF:ATP bindin…	hsa04921(Oxytocin signaling pathway);hsa04923(Regulation of lipolysis in adipocytes);hsa04925(Aldosterone synthesis and secretion);hsa04024(cAMP signaling pathway);hsa04022(cGMP-PKG signaling pathway);hsa04270(Vascular smooth muscle contraction);hsa04924(Renin secretion);hsa00230(Purine metabolism);hsa04714(Thermogenesis)
A0A0B4J1R6	2.337771	0.034669946	Transketolase	7086	TKT	GO:0016604(CC:nuclear body);GO:0016607(CC:nuclear speck);GO:0005654(CC:nucleoplasm);GO:0003824(MF:catalytic activity)	hsa00030(Pentose phosphate pathway)
A0A0A0U994	2.151879	0.009164334	Collagen type IV alpha 5 transcript variant 2	-	COL4A5	GO:0005581(CC:collagen trimer);GO:0005201(MF:extracellular matrix structural constituent)	-
A0A0A6YYG9	2.105892	0.04300893	Protein ARPC4-TTLL3	100526693	ARPC4-TTLL3	GO:0030041(BP:actin filament polymerization);GO:0034314(BP:Arp2/3 complex-mediated actin nucleation);GO:0018094(BP:protein polyglycylation);GO:0005885(CC:Arp2/3 protein complex);GO:0070735(MF:protein-glycine ligase activity)	-
P05543	2.083031	0.018940501	Thyroxine-binding globulin	6906	SERPINA7	GO:0010951(BP:negative regulation of endopeptidase activity);GO:0070327(BP:thyroid hormone transport);GO:0070062(CC:extracellular exosome);GO:0005576(CC:extracellular region);GO:0005615(CC:extracellular space);GO:0004867(MF:serine-type endopeptidase inhibitor activity)	hsa04918(Thyroid hormone synthesis)
A0A024R1S8	1.875998	0.016725698	LIM and SH3 protein 1, isoform CRA_b	3927	LASP1	GO:0030864(CC:cortical actin cytoskeleton);GO:0005925(CC:focal adhesion);GO:0051015(MF:actin filament binding);GO:0015075(MF:ion transmembrane transporter activity);GO:0046872(MF:metal ion binding)	-
B0YJ88	1.642912	0.020547351	Radixin	5962	RDX	GO:0005856(CC:cytoskeleton);GO:0005886(CC:plasma membrane);GO:0003779(MF:actin binding)	hsa05206(MicroRNAs in cancer);hsa05205(Proteoglycans in cancer);hsa04810(Regulation of actin cytoskeleton);hsa04530(Tight junction)
P00338	1.590276	0.012631272	L-lactate dehydrogenase A chain	3939	LDHA	GO:0006096(BP:glycolytic process);GO:0006089(BP:lactate metabolic process);GO:0019674(BP:NAD metabolic process);GO:0043065(BP:positive regulation of apoptotic process);GO:0048569(BP:post-embryonic animal organ development);GO:0006090(BP:pyruvate metabolic process);GO:0051591(BP:response to cAMP);GO:0043627(BP:response to estrogen);GO:0009749(BP:response to glucose);GO:0042542(BP:response to hydro…	hsa04066(HIF-1 signaling pathway);hsa05230(Central carbon metabolism in cancer);hsa00270(Cysteine and methionine metabolism);hsa04922(Glucagon signaling pathway);hsa00640(Propanoate metabolism);hsa00620(Pyruvate metabolism);hsa00010(Glycolysis / Gluconeogenesis)
E7ETH0	1.564278	0.026641087	Complement factor I	-	CFI	GO:0016020(CC:membrane);GO:0005044(MF:scavenger receptor activity);GO:0004252(MF:serine-type endopeptidase activity)	-
A0A140VJE4	0.585814	0.038460999	Testicular tissue protein Li 18	4669	-	GO:0021680(BP:cerebellar Purkinje cell layer development);GO:0060119(BP:inner ear receptor cell development);GO:0045475(BP:locomotor rhythm);GO:0007040(BP:lysosome organization);GO:0042474(BP:middle ear morphogenesis);GO:0046548(BP:retinal rod cell development)	hsa04142(Lysosome);hsa00531(Glycosaminoglycan degradation)
B1AMW1	0.552975	0.030759164	CD58 antigen, (Lymphocyte function-associated antigen 3), isoform CRA_c	-	CD58	GO:0016021(CC:integral component of membrane)	-
B7Z5W1	0.529795	0.01281332	cDNA FLJ54854, highly similar to Junctional adhesion molecule A	-	-	GO:0016021(CC:integral component of membrane)	-
H7BYC3	0.518261	0.023603002	Butyrophilin subfamily 2 member A1	-	BTN2A1	-	-
A0A0A0N0L5	0.513309	0.019829718	IL6ST isoform 3	-	IL6ST	GO:0016021(CC:integral component of membrane);GO:0004896(MF:cytokine receptor activity)	-
A0A024RDY3	0.509447	0.017835694	Lysosomal-associated membrane protein 1, isoform CRA_a	3916	LAMP1	GO:0048102(BP:autophagic cell death);GO:0050821(BP:protein stabilization);GO:0097208(CC:alveolar lamellar body);GO:0044754(CC:autolysosome);GO:0044194(CC:cytolytic granule);GO:0030425(CC:dendrite);GO:0009897(CC:external side of plasma membrane);GO:0030285(CC:integral component of synaptic vesicle membrane);GO:0042470(CC:melanosome);GO:0005771(CC:multivesicular body);GO:0043025(CC:neuronal cell bo…	hsa05152(Tuberculosis);hsa04142(Lysosome);hsa04140(Autophagy - animal);hsa04145(Phagosome)
A0A024QZ62	0.49864	0.014122793	HCG1998851, isoform CRA_c	2319	hCG_1998851	GO:0098937(BP:anterograde dendritic transport);GO:0045661(BP:regulation of myoblast differentiation);GO:0099072(BP:regulation of postsynaptic membrane neurotransmitter receptor levels);GO:0002080(CC:acrosomal membrane);GO:0099029(CC:anchored component of presynaptic active zone membrane);GO:0032839(CC:dendrite cytoplasm);GO:0016600(CC:flotillin complex);GO:0098978(CC:glutamatergic synapse);GO:003…	hsa04910(Insulin signaling pathway)
Q6EMK4	0.488605	0.02879661	Vasorin	114990	VASN	GO:0071456(BP:cellular response to hypoxia);GO:0071461(BP:cellular response to redox state);GO:0010719(BP:negative regulation of epithelial to mesenchymal transition);GO:0030512(BP:negative regulation of transforming growth factor beta receptor signaling pathway);GO:0009986(CC:cell surface);GO:0070062(CC:extracellular exosome);GO:0031012(CC:extracellular matrix);GO:0005615(CC:extracellular space)…	-
P09619	0.487074	0.027548653	Platelet-derived growth factor receptor beta	5159	PDGFRB	GO:0007568(BP:aging);GO:0035909(BP:aorta morphogenesis);GO:0055003(BP:cardiac myofibril assembly);GO:0060326(BP:cell chemotaxis);GO:0030154(BP:cell differentiation);GO:0016477(BP:cell migration);GO:0060981(BP:cell migration involved in coronary angiogenesis);GO:0035441(BP:cell migration involved in vasculogenesis);GO:0006024(BP:glycosaminoglycan biosynthetic process);GO:0048839(BP:inner ear devel…	hsa04020(Calcium signaling pathway);hsa05231(Choline metabolism in cancer);hsa01521(EGFR tyrosine kinase inhibitor resistance);hsa05206(MicroRNAs in cancer);hsa05200(Pathways in cancer);hsa05214(Glioma);hsa05215(Prostate cancer);hsa04540(Gap junction);hsa04014(Ras signaling pathway);hsa05230(Central carbon metabolism in cancer);hsa04151(PI3K-Akt signaling pathway);hsa04010(MAPK signaling pathway)…
A0A087X0K0	0.482798	0.029129888	Collagen alpha-1(XV) chain	-	COL15A1	GO:0007155(BP:cell adhesion);GO:0005604(CC:basement membrane);GO:0005581(CC:collagen trimer);GO:0005198(MF:structural molecule activity)	-
Q5IJ48	0.473491	0.008627224	Protein crumbs homolog 2	286204	CRB2	GO:0072358(BP:cardiovascular system development);GO:0055111(BP:ingression involved in gastrulation with mouth forming second);GO:0045199(BP:maintenance of epithelial cell apical/basal polarity);GO:0001707(BP:mesoderm formation);GO:0010951(BP:negative regulation of endopeptidase activity);GO:0014028(BP:notochord formation);GO:0030513(BP:positive regulation of BMP signaling pathway);GO:0010718(BP:p…	hsa04390(Hippo signaling pathway)
F5H265	0.467781	0.022958938	Polyubiquitin-C	-	UBC	-	-
O75051	0.459791	0.027549001	Plexin-A2	5362	PLXNA2	GO:0051642(BP:centrosome localization);GO:0021935(BP:cerebellar granule cell precursor tangential migration);GO:0060174(BP:limb bud formation);GO:0007162(BP:negative regulation of cell adhesion);GO:0021915(BP:neural tube development);GO:0060037(BP:pharyngeal system development);GO:0050772(BP:positive regulation of axonogenesis);GO:0030334(BP:regulation of cell migration);GO:0008360(BP:regulation …	hsa04360(Axon guidance)
A0A1W2PQB1	0.458362	0.048260111	Fc of IgG low affinity IIIa receptor isoform 1	-	FCGR3A	GO:0016021(CC:integral component of membrane)	-
Q9GZX9	0.454595	0.01704508	Twisted gastrulation protein homolog 1	57045	TWSG1	GO:0030509(BP:BMP signaling pathway);GO:0043010(BP:camera-type eye development);GO:0030154(BP:cell differentiation);GO:0030900(BP:forebrain development);GO:0030097(BP:hemopoiesis);GO:0001707(BP:mesoderm formation);GO:0030514(BP:negative regulation of BMP signaling pathway);GO:2000515(BP:negative regulation of CD4-positive, alpha-beta T cell activation);GO:2000562(BP:negative regulation of CD4-pos…	-
A8K309	0.451416	0.01566001	cDNA FLJ76654, highly similar to Homo sapiens CD44 antigen (homing function and Indian blood group system) (CD44), transcript variant 4, mRNA	-	-	GO:0007155(BP:cell adhesion);GO:0016021(CC:integral component of membrane);GO:0005540(MF:hyaluronic acid binding)	-
B2R831	0.450098	0.044082939	cDNA, FLJ93714, highly similar to Homo sapiens tumor necrosis factor receptor superfamily, member 10c, decoy without an intracellular domain (TNFRSF10C), mRNA	-	-	GO:0016021(CC:integral component of membrane);GO:0045569(MF:TRAIL binding)	-
P07998	0.448771	0.043993011	Ribonuclease pancreatic	6035	RNASE1	GO:0090501(BP:RNA phosphodiester bond hydrolysis);GO:0070062(CC:extracellular exosome);GO:0003676(MF:nucleic acid binding);GO:0004522(MF:ribonuclease A activity);GO:0004540(MF:ribonuclease activity)	-
B7ZKQ2	0.44282	0.038611128	CLEC4G protein	339390	CLEC4G	GO:0016021(CC:integral component of membrane);GO:0030246(MF:carbohydrate binding)	-
D6R917	0.437639	0.035657538	Glucosamine-6-phosphate isomerase 1	-	GNPDA1	GO:0005975(BP:carbohydrate metabolic process);GO:0006044(BP:N-acetylglucosamine metabolic process);GO:0004342(MF:glucosamine-6-phosphate deaminase activity)	-
A0A109NGN6	0.430405	0.022313939	Proteasome subunit alpha type	5686	-	GO:0043161(BP:proteasome-mediated ubiquitin-dependent protein catabolic process);GO:0005829(CC:cytosol);GO:0005634(CC:nucleus);GO:0019773(CC:proteasome core complex, alpha-subunit complex);GO:0004298(MF:threonine-type endopeptidase activity)	hsa03050(Proteasome)
B4E1Z4	0.428008	0.018482014	cDNA FLJ55673, highly similar to Complement factor B	-	-	GO:0004252(MF:serine-type endopeptidase activity)	-
G3V3X5	0.426931	0.017794663	Latent-transforming growth factor beta-binding protein 2	-	LTBP2	GO:0005509(MF:calcium ion binding)	-
C9J8T4	0.426728	0.014669344	E3 ubiquitin-protein ligase RNF13	-	RNF13	GO:0005829(CC:cytosol);GO:0043231(CC:intracellular membrane-bounded organelle);GO:0005654(CC:nucleoplasm)	-
K7ESC2	0.424445	0.009764903	IGF-like family receptor 1	-	IGFLR1	-	-
Q86T13	0.422972	0.040359348	C-type lectin domain family 14 member A	161198	CLEC14A	GO:0016477(BP:cell migration);GO:0002042(BP:cell migration involved in sprouting angiogenesis);GO:0062023(CC:collagen-containing extracellular matrix);GO:0009897(CC:external side of plasma membrane);GO:0016021(CC:integral component of membrane);GO:0030246(MF:carbohydrate binding);GO:0050840(MF:extracellular matrix binding);GO:1990430(MF:extracellular matrix protein binding)	-
Q8TBP5	0.417895	0.012217505	Membrane protein FAM174A	345757	FAM174A	GO:0016021(CC:integral component of membrane)	-
A0A024RAQ9	0.417552	0.036510056	Chondroitin sulfate proteoglycan 2 (Versican), isoform CRA_b	1462	CSPG2	GO:0007155(BP:cell adhesion);GO:0005509(MF:calcium ion binding);GO:0005540(MF:hyaluronic acid binding)	hsa04514(Cell adhesion molecules (CAMs))
A0A146E5L3	0.414024	0.008632253	Mesenchymal stromal cell-and fibroblast-expressing Linx paralogue	3671	Meflin	-	-
A0PJG2	0.407403	0.049490743	LPHN1 protein	-	LPHN1	GO:0016020(CC:membrane);GO:0030246(MF:carbohydrate binding);GO:0004930(MF:G protein-coupled receptor activity)	-
B1N7B8	0.407182	0.025723103	Cryocrystalglobulin CC1 kappa light chain variable region	-	-	-	-
O00241	0.402356	0.031779735	Signal-regulatory protein beta-1	10326	SIRPB1	GO:0007166(BP:cell surface receptor signaling pathway);GO:0045087(BP:innate immune response);GO:0043312(BP:neutrophil degranulation);GO:0022409(BP:positive regulation of cell-cell adhesion);GO:0050766(BP:positive regulation of phagocytosis);GO:0050870(BP:positive regulation of T cell activation);GO:0007165(BP:signal transduction);GO:0009986(CC:cell surface);GO:0005887(CC:integral component of pla…	hsa04380(Osteoclast differentiation)
Q9H461	0.402351	0.029258905	Frizzled-8	8325	FZD8	GO:0001525(BP:angiogenesis);GO:0060070(BP:canonical Wnt signaling pathway);GO:0000122(BP:negative regulation of transcription by RNA polymerase II);GO:0030182(BP:neuron differentiation);GO:0035567(BP:non-canonical Wnt signaling pathway);GO:0043507(BP:positive regulation of JUN kinase activity);GO:0045944(BP:positive regulation of transcription by RNA polymerase II);GO:0033077(BP:T cell differenti…	hsa05226(Gastric cancer);hsa04150(mTOR signaling pathway);hsa05165(Human papillomavirus infection);hsa04934(Cushing syndrome);hsa04550(Signaling pathways regulating pluripotency of stem cells);hsa05166(Human T-cell leukemia virus 1 infection);hsa04916(Melanogenesis);hsa05200(Pathways in cancer);hsa05217(Basal cell carcinoma);hsa04310(Wnt signaling pathway);hsa05205(Proteoglycans in cancer);hsa052…
A8K7T4	0.39617	0.04612681	cDNA FLJ75774, highly similar to Homo sapiens lectin, mannose-binding 2 (LMAN2), mRNA	-	-	GO:0016021(CC:integral component of membrane);GO:0030246(MF:carbohydrate binding)	-
A0A090N7V5	0.39179	0.026807476	Chromosome 7 open reading frame 24	79017	C7orf24	GO:0003839(MF:gamma-glutamylcyclotransferase activity)	hsa00480(Glutathione metabolism)
H0YBZ2	0.391246	0.023189988	HLA class II histocompatibility antigen gamma chain	-	CD74	GO:0019882(BP:antigen processing and presentation);GO:0006955(BP:immune response);GO:0006886(BP:intracellular protein transport);GO:0070206(BP:protein trimerization);GO:0016021(CC:integral component of membrane);GO:0005622(CC:intracellular);GO:0042289(MF:MHC class II protein binding)	-
B7ZLY3	0.390398	0.007343977	LTBP1 protein	4052	LTBP1	GO:0001527(CC:microfibril);GO:0032991(CC:protein-containing complex);GO:0005509(MF:calcium ion binding);GO:0050436(MF:microfibril binding)	hsa04350(TGF-beta signaling pathway)
A0A087X2B5	0.387571	0.028370492	Basigin	-	BSG	GO:0016020(CC:membrane)	-
P26842	0.387498	0.028011371	CD27 antigen	939	CD27	GO:0007166(BP:cell surface receptor signaling pathway);GO:0097191(BP:extrinsic apoptotic signaling pathway);GO:0016064(BP:immunoglobulin mediated immune response);GO:0043066(BP:negative regulation of apoptotic process);GO:0070233(BP:negative regulation of T cell apoptotic process);GO:0045579(BP:positive regulation of B cell differentiation);GO:0046330(BP:positive regulation of JNK cascade);GO:190…	hsa04060(Cytokine-cytokine receptor interaction)
Q9UN70	0.385069	0.026535768	Protocadherin gamma-C3	5098	PCDHGC3	GO:0016339(BP:calcium-dependent cell-cell adhesion via plasma membrane cell adhesion molecules);GO:0007155(BP:cell adhesion);GO:0007156(BP:homophilic cell adhesion via plasma membrane adhesion molecules);GO:0050808(BP:synapse organization);GO:0005887(CC:integral component of plasma membrane);GO:0016020(CC:membrane);GO:0005509(MF:calcium ion binding)	-
A0A024R972	0.377048	0.010291585	Laminin, gamma 1 (Formerly LAMB2), isoform CRA_a	-	LAMC1	-	-
A8KAL5	0.36914	0.009388371	cDNA FLJ77224, highly similar to Homo sapiens collagen, type XIV, alpha 1 (undulin) (COL14A1), mRNA	-	-	GO:0005581(CC:collagen trimer)	-
A0A024RCJ0	0.362573	0.001962326	Discoidin domain receptor family, member 1, isoform CRA_b	780	DDR1	GO:0061564(BP:axon development);GO:0060444(BP:branching involved in mammary gland duct morphogenesis);GO:0043583(BP:ear development);GO:0007566(BP:embryo implantation);GO:0060749(BP:mammary gland alveolus development);GO:0008285(BP:negative regulation of cell proliferation);GO:1990138(BP:neuron projection extension);GO:0038083(BP:peptidyl-tyrosine autophosphorylation);GO:0001558(BP:regulation of …	-
B4DSX5	0.353191	0.008982563	cDNA FLJ61381, highly similar to Interleukin-10 receptor beta chain	-	-	GO:0016021(CC:integral component of membrane)	-
Q07954	0.351815	0.011494087	Prolow-density lipoprotein receptor-related protein 1	4035	LRP1	GO:0007568(BP:aging);GO:0097242(BP:amyloid-beta clearance);GO:0035909(BP:aorta morphogenesis);GO:0043277(BP:apoptotic cell clearance);GO:0002265(BP:astrocyte activation involved in immune response);GO:0008283(BP:cell proliferation);GO:1904646(BP:cellular response to amyloid-beta);GO:0021987(BP:cerebral cortex development);GO:0006629(BP:lipid metabolic process);GO:0042157(BP:lipoprotein metabolic …	hsa04979(Cholesterol metabolism);hsa05144(Malaria);hsa05010(Alzheimer disease)
A1L4F5	0.351244	0.037790228	Receptor tyrosine kinase-like orphan receptor 2	-	ROR2	GO:0007169(BP:transmembrane receptor protein tyrosine kinase signaling pathway);GO:0016021(CC:integral component of membrane);GO:0005524(MF:ATP binding);GO:0004672(MF:protein kinase activity)	-
P54760	0.35053	0.046064266	Ephrin type-B receptor 4	2050	EPHB4	GO:0001525(BP:angiogenesis);GO:0007155(BP:cell adhesion);GO:0030154(BP:cell differentiation);GO:0002042(BP:cell migration involved in sprouting angiogenesis);GO:0048013(BP:ephrin receptor signaling pathway);GO:0003007(BP:heart morphogenesis);GO:0043066(BP:negative regulation of apoptotic process);GO:0009968(BP:negative regulation of signal transduction);GO:0070374(BP:positive regulation of ERK1 a…	hsa04360(Axon guidance)
B7Z3L6	0.347665	0.045369077	cDNA FLJ58165, highly similar to Sodium/nucleoside cotransporter 1	9154	SLC28A1	GO:0005887(CC:integral component of plasma membrane);GO:0005415(MF:nucleoside:sodium symporter activity)	-
A4GW21	0.341225	0.044765422	Programmed cell death ligand 2	-	-	GO:0016021(CC:integral component of membrane)	-
A0A0G2JMW3	0.340976	0.031317307	Cadherin-related family member 5	-	CDHR5	GO:0007156(BP:homophilic cell adhesion via plasma membrane adhesion molecules);GO:0016021(CC:integral component of membrane);GO:0005886(CC:plasma membrane);GO:0005509(MF:calcium ion binding)	-
A0A0A6YYJ4	0.339806	0.004725458	Trefoil factor 3	7033	TFF3	GO:0030277(BP:maintenance of gastrointestinal epithelium);GO:0010906(BP:regulation of glucose metabolic process);GO:0005576(CC:extracellular region);GO:0005615(CC:extracellular space);GO:0030141(CC:secretory granule)	-
K7EPJ4	0.338166	0.018479777	Cartilage intermediate layer protein 2, isoform CRA_b	-	CILP2	-	-
P24821	0.336912	0.027943582	Tenascin	3371	TNC	GO:0060447(BP:bud outgrowth involved in lung branching);GO:0007155(BP:cell adhesion);GO:0044267(BP:cellular protein metabolic process);GO:0071799(BP:cellular response to prostaglandin D stimulus);GO:0071300(BP:cellular response to retinoic acid);GO:0071305(BP:cellular response to vitamin D);GO:0030198(BP:extracellular matrix organization);GO:0060739(BP:mesenchymal-epithelial cell signaling involv…	hsa04510(Focal adhesion);hsa05165(Human papillomavirus infection);hsa05206(MicroRNAs in cancer);hsa04512(ECM-receptor interaction);hsa04151(PI3K-Akt signaling pathway)
Q16769	0.336821	0.039055046	Glutaminyl-peptide cyclotransferase	25797	QPCT	GO:0006464(BP:cellular protein modification process);GO:0043312(BP:neutrophil degranulation);GO:0017186(BP:peptidyl-pyroglutamic acid biosynthetic process, using glutaminyl-peptide cyclotransferase);GO:0070062(CC:extracellular exosome);GO:0005576(CC:extracellular region);GO:1904813(CC:ficolin-1-rich granule lumen);GO:0035580(CC:specific granule lumen);GO:1904724(CC:tertiary granule lumen);GO:0016…	-
A0A024R5M3	0.335323	0.030468394	Cortactin, isoform CRA_c	2017	CTTN	GO:0030041(BP:actin filament polymerization)	hsa04530(Tight junction);hsa05100(Bacterial invasion of epithelial cells);hsa05205(Proteoglycans in cancer);hsa05130(Pathogenic Escherichia coli infection);hsa05131(Shigellosis)
D6RGG3	0.334184	0.00359792	Collagen alpha-1(XII) chain	-	COL12A1	GO:0030199(BP:collagen fibril organization);GO:0005595(CC:collagen type XII trimer)	-
A0A096LP69	0.326656	0.045276555	CD99 antigen	4267	CD99	GO:0016021(CC:integral component of membrane)	hsa04670(Leukocyte transendothelial migration);hsa04514(Cell adhesion molecules (CAMs))
A0A087X1T7	0.307261	0.039872423	Aggrecan core protein	-	ACAN	GO:0007155(BP:cell adhesion);GO:0005540(MF:hyaluronic acid binding)	-
B4E0V9	0.306974	0.015734325	cDNA FLJ61198, highly similar to Homo sapiens CD300 antigen like family member E (CD300LE), mRNA	342510	-	GO:0016021(CC:integral component of membrane)	-
B4DPV8	0.306946	0.013535145	cDNA FLJ51928, highly similar to Keratinocytes-associated transmembrane protein 2	-	-	GO:0016021(CC:integral component of membrane)	-
D6RF86	0.302899	0.0383746	Cadherin-6	-	CDH6	GO:0007156(BP:homophilic cell adhesion via plasma membrane adhesion molecules);GO:0016021(CC:integral component of membrane);GO:0005886(CC:plasma membrane);GO:0005509(MF:calcium ion binding)	-
A0A024R819	0.300998	0.029607462	Nudix (Nucleoside diphosphate linked moiety X)-type motif 1, isoform CRA_a	4521	NUDT1	GO:0006281(BP:DNA repair);GO:0005829(CC:cytosol);GO:0008413(MF:8-oxo-7,8-dihydroguanosine triphosphate pyrophosphatase activity)	-
B1AKG0	0.29159	0.046995339	Complement factor H-related protein 1	-	CFHR1	-	-
A0A0R7FJH5	0.288147	0.039460369	Coagulation factor XII	-	F12	GO:0005615(CC:extracellular space);GO:0005509(MF:calcium ion binding);GO:0004252(MF:serine-type endopeptidase activity)	-
P55000	0.285236	0.003764367	Secreted Ly-6/uPAR-related protein 1	57152	SLURP1	GO:0001775(BP:cell activation);GO:0007155(BP:cell adhesion);GO:0007626(BP:locomotory behavior);GO:0030336(BP:negative regulation of cell migration);GO:0008285(BP:negative regulation of cell proliferation);GO:0010839(BP:negative regulation of keratinocyte proliferation);GO:0050884(BP:neuromuscular process controlling posture);GO:0038195(BP:urokinase plasminogen activator signaling pathway);GO:0070…	-
D3DTX7	0.279589	0.013866009	Collagen, type I, alpha 1, isoform CRA_a	-	COL1A1	GO:0005581(CC:collagen trimer);GO:0005201(MF:extracellular matrix structural constituent)	-
B2R7N9	0.278398	0.010423415	cDNA, FLJ93532, highly similar to Homo sapiens osteomodulin (OMD), mRNA	-	-	GO:0030500(BP:regulation of bone mineralization);GO:0062023(CC:collagen-containing extracellular matrix)	-
A0A140VJC8	0.277032	0.013629239	Testicular tissue protein Li 2	351	-	GO:0008344(BP:adult locomotory behavior);GO:0008088(BP:axo-dendritic transport);GO:0016199(BP:axon midline choice point recognition);GO:0006878(BP:cellular copper ion homeostasis);GO:0071320(BP:cellular response to cAMP);GO:0071280(BP:cellular response to copper ion);GO:0071287(BP:cellular response to manganese ion);GO:1990090(BP:cellular response to nerve growth factor stimulus);GO:0071874(BP:ce…	hsa04726(Serotonergic synapse);hsa05010(Alzheimer disease)
A1YVW6	0.276767	0.00795987	Major prion protein	-	PRNP	GO:0051260(BP:protein homooligomerization);GO:0016021(CC:integral component of membrane);GO:0005886(CC:plasma membrane);GO:0046872(MF:metal ion binding)	-
P02671	0.276032	0.01423498	Fibrinogen alpha chain	2243	FGA	GO:0002250(BP:adaptive immune response);GO:0007596(BP:blood coagulation);GO:0072377(BP:blood coagulation, common pathway);GO:0072378(BP:blood coagulation, fibrin clot formation);GO:0007160(BP:cell-matrix adhesion);GO:0044267(BP:cellular protein metabolic process);GO:0034622(BP:cellular protein-containing complex assembly);GO:0030198(BP:extracellular matrix organization);GO:0042730(BP:fibrinolysis…	hsa04611(Platelet activation);hsa04610(Complement and coagulation cascades)
G3XAK1	0.275941	0.023769565	Hepatocyte growth factor-like protein	4485	MST1	GO:0071456(BP:cellular response to hypoxia);GO:0007566(BP:embryo implantation);GO:0030317(BP:flagellated sperm motility);GO:0060763(BP:mammary duct terminal end bud growth);GO:1904036(BP:negative regulation of epithelial cell apoptotic process);GO:0010628(BP:positive regulation of gene expression);GO:0033601(BP:positive regulation of mammary gland epithelial cell proliferation);GO:0046425(BP:regu…	-
A0A087X0T8	0.268549	0.006934819	Cell adhesion molecule 1	-	CADM1	GO:0016021(CC:integral component of membrane)	-
P02452	0.268216	0.028698073	Collagen alpha-1(I) chain	1277	COL1A1	GO:0007596(BP:blood coagulation);GO:0001568(BP:blood vessel development);GO:0060346(BP:bone trabecula formation);GO:0060351(BP:cartilage development involved in endochondral bone morphogenesis);GO:0071230(BP:cellular response to amino acid stimulus);GO:0071364(BP:cellular response to epidermal growth factor stimulus);GO:0044344(BP:cellular response to fibroblast growth factor stimulus);GO:1902618…	hsa04933(AGE-RAGE signaling pathway in diabetic complications);hsa04151(PI3K-Akt signaling pathway);hsa04926(Relaxin signaling pathway);hsa04512(ECM-receptor interaction);hsa05165(Human papillomavirus infection);hsa04611(Platelet activation);hsa05146(Amoebiasis);hsa04510(Focal adhesion);hsa04974(Protein digestion and absorption)
A0A024R5G2	0.266478	0.006957623	Interleukin 18 binding protein, isoform CRA_d	10068	IL18BP	GO:0070301(BP:cellular response to hydrogen peroxide);GO:0071356(BP:cellular response to tumor necrosis factor);GO:0032496(BP:response to lipopolysaccharide);GO:0005615(CC:extracellular space)	-
A0A024R462	0.258398	0.027219938	Fibronectin 1, isoform CRA_n	-	FN1	GO:0005576(CC:extracellular region)	-
P05556	0.256143	0.016189382	Integrin beta-1	3688	ITGB1	GO:0048675(BP:axon extension);GO:0030183(BP:B cell differentiation);GO:0071711(BP:basement membrane organization);GO:0007161(BP:calcium-independent cell-matrix adhesion);GO:0055007(BP:cardiac muscle cell differentiation);GO:0033627(BP:cell adhesion mediated by integrin);GO:0001708(BP:cell fate specification);GO:0016477(BP:cell migration);GO:0002042(BP:cell migration involved in sprouting angiogen…	hsa04145(Phagosome);hsa05131(Shigellosis);hsa04611(Platelet activation);hsa05133(Pertussis);hsa04510(Focal adhesion);hsa04015(Rap1 signaling pathway);hsa05140(Leishmaniasis);hsa04512(ECM-receptor interaction);hsa04670(Leukocyte transendothelial migration);hsa05165(Human papillomavirus infection);hsa04514(Cell adhesion molecules (CAMs));hsa05145(Toxoplasmosis);hsa04360(Axon guidance);hsa05222(Smal…
D3DPK5	0.251592	0.013940997	SH3 domain binding glutamic acid-rich protein like 3, isoform CRA_a	-	SH3BGRL3	GO:0045454(BP:cell redox homeostasis);GO:0005623(CC:cell);GO:0009055(MF:electron transfer activity);GO:0015035(MF:protein disulfide oxidoreductase activity)	-
A8K3I0	0.249778	0.029123936	cDNA FLJ78437, highly similar to Homo sapiens cartilage oligomeric matrix protein (COMP), mRNA	-	-	GO:0007155(BP:cell adhesion);GO:0005576(CC:extracellular region);GO:0005509(MF:calcium ion binding)	-
Q66K79	0.246305	0.010752114	Carboxypeptidase Z	8532	CPZ	GO:0006518(BP:peptide metabolic process);GO:0016485(BP:protein processing);GO:0006508(BP:proteolysis);GO:0016055(BP:Wnt signaling pathway);GO:0005615(CC:extracellular space);GO:0004181(MF:metallocarboxypeptidase activity);GO:0008270(MF:zinc ion binding)	-
Q92859	0.244778	0.002130617	Neogenin	4756	NEO1	GO:0007411(BP:axon guidance);GO:0007155(BP:cell adhesion);GO:0055072(BP:iron ion homeostasis);GO:0030513(BP:positive regulation of BMP signaling pathway);GO:0005794(CC:Golgi apparatus);GO:0005887(CC:integral component of plasma membrane);GO:0005654(CC:nucleoplasm);GO:0005886(CC:plasma membrane);GO:0098797(CC:plasma membrane protein complex);GO:0039706(MF:co-receptor binding);GO:0038023(MF:signali…	hsa04514(Cell adhesion molecules (CAMs))
O75339	0.244748	0.021066281	Cartilage intermediate layer protein 1	8483	CILP	GO:0071560(BP:cellular response to transforming growth factor beta stimulus);GO:0016311(BP:dephosphorylation);GO:0010629(BP:negative regulation of gene expression);GO:0043569(BP:negative regulation of insulin-like growth factor receptor signaling pathway);GO:0060392(BP:negative regulation of SMAD protein signal transduction);GO:0062023(CC:collagen-containing extracellular matrix);GO:0070062(CC:ex…	-
A0N7J6	0.240306	0.049720885	REV25-2	-	-	-	-
B2RCB8	0.24021	0.046960737	cDNA, FLJ95971, highly similar to Homo sapiens protocadherin 12 (PCDH12), mRNA	-	-	GO:0007156(BP:homophilic cell adhesion via plasma membrane adhesion molecules);GO:0005911(CC:cell-cell junction);GO:0016021(CC:integral component of membrane);GO:0005886(CC:plasma membrane);GO:0005509(MF:calcium ion binding)	-
A0A087WTA8	0.236638	0.019925003	Collagen alpha-2(I) chain	-	COL1A2	GO:0005783(CC:endoplasmic reticulum);GO:0005201(MF:extracellular matrix structural constituent)	-
A0A024R7D5	0.231852	0.00803269	Low density lipoprotein receptor (Familial hypercholesterolemia), isoform CRA_b	3949	LDLR	GO:0097242(BP:amyloid-beta clearance);GO:0071398(BP:cellular response to fatty acid);GO:0042632(BP:cholesterol homeostasis);GO:0070508(BP:cholesterol import);GO:0008203(BP:cholesterol metabolic process);GO:0034384(BP:high-density lipoprotein particle clearance);GO:0042159(BP:lipoprotein catabolic process);GO:0007616(BP:long-term memory);GO:0034383(BP:low-density lipoprotein particle clearance);GO…	hsa05145(Toxoplasmosis);hsa05160(Hepatitis C);hsa04934(Cushing syndrome);hsa04979(Cholesterol metabolism);hsa04913(Ovarian steroidogenesis);hsa04144(Endocytosis);hsa04976(Bile secretion);hsa04925(Aldosterone synthesis and secretion);hsa04927(Cortisol synthesis and secretion)
B4DUV1	0.229066	0.035533733	Fibulin-1	-	-	GO:0030198(BP:extracellular matrix organization);GO:0005576(CC:extracellular region);GO:0005509(MF:calcium ion binding);GO:0016504(MF:peptidase activator activity)	-
Q9BYJ0	0.227003	0.032501597	Fibroblast growth factor-binding protein 2	83888	FGFBP2	GO:0007267(BP:cell-cell signaling);GO:0005615(CC:extracellular space);GO:0019838(MF:growth factor binding)	-
A0A024R816	0.216733	0.038895725	Protein tweety homolog	80727	TTYH3	GO:0034707(CC:chloride channel complex);GO:0005886(CC:plasma membrane);GO:0005254(MF:chloride channel activity)	-
A0A087WYX9	0.212248	0.011649759	Collagen alpha-2(V) chain	-	COL5A2	GO:0005201(MF:extracellular matrix structural constituent)	-
Q9ULI3	0.209234	0.043614263	Protein HEG homolog 1	57493	HEG1	GO:0003209(BP:cardiac atrium morphogenesis);GO:0055017(BP:cardiac muscle tissue growth);GO:0007043(BP:cell-cell junction assembly);GO:0001886(BP:endothelial cell morphogenesis);GO:0007507(BP:heart development);GO:0001701(BP:in utero embryonic development);GO:0030324(BP:lung development);GO:0003017(BP:lymph circulation);GO:0001945(BP:lymph vessel development);GO:0035264(BP:multicellular organism g…	-
A0A024R962	0.183577	0.015611251	HCG40889, isoform CRA_b	3075	hCG_40889	-	hsa04610(Complement and coagulation cascades);hsa05150(Staphylococcus aureus infection)
B3KWI4	0.176865	0.023551651	cDNA FLJ43122 fis, clone CTONG3003737, highly similar to Leucine-rich repeat-containing protein 15	131578	-	GO:0016021(CC:integral component of membrane)	-
P13671	0.176456	0.016554767	Complement component C6	729	C6	GO:0006956(BP:complement activation);GO:0006958(BP:complement activation, classical pathway);GO:0019835(BP:cytolysis);GO:0001701(BP:in utero embryonic development);GO:0045087(BP:innate immune response);GO:0001970(BP:positive regulation of activation of membrane attack complex);GO:0045766(BP:positive regulation of angiogenesis);GO:0030449(BP:regulation of complement activation);GO:0070062(CC:extra…	hsa05322(Systemic lupus erythematosus);hsa05020(Prion diseases);hsa04610(Complement and coagulation cascades)
A4D2D2	0.176283	0.013068404	Procollagen C-endopeptidase enhancer	-	PCOLCE	GO:0005581(CC:collagen trimer);GO:0005615(CC:extracellular space);GO:0005518(MF:collagen binding);GO:0008201(MF:heparin binding);GO:0016504(MF:peptidase activator activity)	-
Q5NV74	0.104526	0.035844407	V2-14 protein	-	V2-14	-	-
P06312	0.079426	0.02059923	Immunoglobulin kappa variable 4-1	-	IGKV4-1	GO:0006956(BP:complement activation);GO:0006958(BP:complement activation, classical pathway);GO:0038095(BP:Fc-epsilon receptor signaling pathway);GO:0038096(BP:Fc-gamma receptor signaling pathway involved in phagocytosis);GO:0006955(BP:immune response);GO:0002377(BP:immunoglobulin production);GO:0050900(BP:leukocyte migration);GO:0006898(BP:receptor-mediated endocytosis);GO:0030449(BP:regulation …	-
